# Supplementary material for: Hydration and Ion Pair Formation in Aqueous Lu3+- Solution
Source: MDPI journal article supplement (doi:10.3390/molecules23123237), 2018-12-07
Supplement: s1 [file s1]

## Supplementary Information

**Table S1.** Assignment and approximate description of the calculated vibrational modes using B3LYP/SDD of  $[\text{Lu}(\text{H}_2\text{O})_8]^{3+}$  and  $[\text{Lu}(\text{D}_2\text{O})_8]^{3+}$  applying the PC model to the contribution of the normal modes of the  $\text{LuO}_8$  skeleton.

| Peak position/ $\text{cm}^{-1}$   |                                   | LuO <sub>8</sub> vibrations |                |          | Description of the corresponding Raman active Lu-OH <sub>2</sub> / LuOD <sub>2</sub> normal modes    |                                                                                                   |                                                                    |
|-----------------------------------|-----------------------------------|-----------------------------|----------------|----------|------------------------------------------------------------------------------------------------------|---------------------------------------------------------------------------------------------------|--------------------------------------------------------------------|
| $[\text{Lu}(\text{OH}_2)_8]^{3+}$ | $[\text{Lu}(\text{OD}_2)_8]^{3+}$ | Mode                        | Symmetry       | Activity | Restricted translation of H <sub>2</sub> O/D <sub>2</sub> O along Lu-O bond; angles O-Lu-O are fixed | Restricted rotation of H <sub>2</sub> O/D <sub>2</sub> O with resp. to Lu; Lu-O distance is fixed | (Small)H <sub>2</sub> O/D <sub>2</sub> O librational contributions |
| 56.3                              | 51.4                              | $\delta$                    | e <sub>2</sub> | R        |                                                                                                      | x                                                                                                 | x                                                                  |
| 117.3                             | 106.8                             | $\delta$                    | b <sub>2</sub> | i.r.     |                                                                                                      |                                                                                                   |                                                                    |
| 130.0                             | 122.5                             | $\delta$                    | b <sub>1</sub> | n.a.     |                                                                                                      |                                                                                                   |                                                                    |
| 132.1                             | 120.4                             | $\delta$                    | e <sub>1</sub> | i.r.     |                                                                                                      |                                                                                                   |                                                                    |
| 160.7                             | 149.1                             | $\delta$                    | e <sub>1</sub> | i.r.     |                                                                                                      |                                                                                                   |                                                                    |
| 163.9                             | 150.5                             | $\delta$                    | a <sub>1</sub> | R        |                                                                                                      | x                                                                                                 | x                                                                  |
| 168.1                             | 153.5                             | $\delta$                    | e <sub>3</sub> | R        |                                                                                                      | x                                                                                                 | x                                                                  |
| 176.3                             | 186.2                             | $\delta$                    | e <sub>2</sub> | R        |                                                                                                      | x                                                                                                 | x                                                                  |
| 291.3                             | 271.1                             | v <sub>as</sub>             | e <sub>2</sub> | R        | x                                                                                                    |                                                                                                   | x                                                                  |
| 198.3                             | 285.6                             | v <sub>as</sub>             | e <sub>3</sub> | R        | x                                                                                                    |                                                                                                   | x                                                                  |
| 320.3                             | 298.6                             | v <sub>as</sub>             | b <sub>2</sub> | i.r.     |                                                                                                      |                                                                                                   |                                                                    |
| 337.3                             | 314.6                             | v <sub>as</sub>             | e <sub>1</sub> | i.r.     |                                                                                                      |                                                                                                   |                                                                    |
| 376.3                             | 356.3                             | v <sub>s</sub>              | a <sub>1</sub> | R        | x                                                                                                    |                                                                                                   |                                                                    |

**Remarks:** The LuO<sub>8</sub> skeleton modes may be divided into modes with restricted translation or restricted rotation character of the water molecules. In the first case the O-Lu-O angles of the ligands, water molecules, remain fixed whereas in the second case the Lu-O distances remain fixed. Additionally, water molecules perform small librations as a whole (without H-O-H bending or O-H stretching). Small accompanying librations are necessary for reasons of symmetry because during the vibration the mass centre of the cluster is conserved. Only in the case of the total symmetric breathing vibration of the cluster the water molecules move along the Lu-O ligand bonds without any librational contribution or changes of the O-Lu-O angles.

## Figures

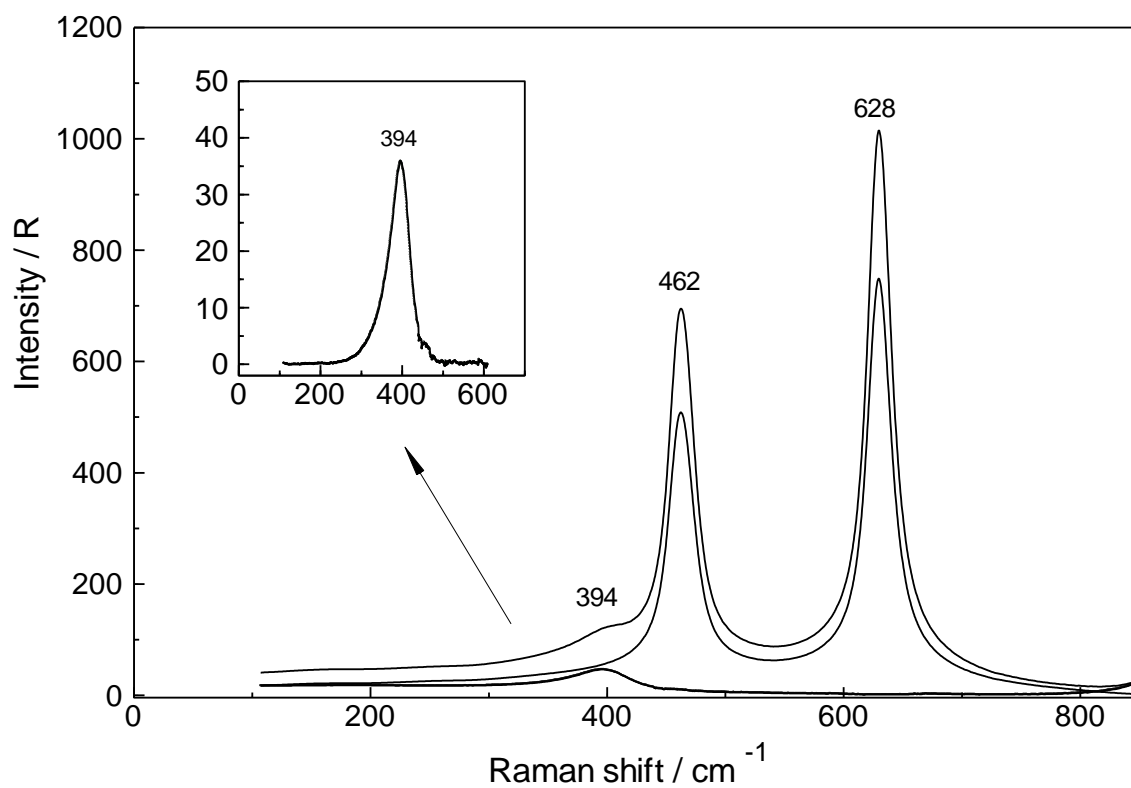

**Figure S1.** Raman scattering profiles in R-format (from top to bottom: polarized, depolarized and isotropic scattering profiles) of a 2.233 molL<sup>-1</sup> Lu(ClO<sub>4</sub>)<sub>3</sub> solution ( $R_w = 19.01$ ). The ClO<sub>4</sub><sup>-</sup>(aq) deformation bands at 462 and 628 cm<sup>-1</sup> are depolarized and therefore do not appear in the isotropic scattering. The inset shows  $\nu_1$  Lu-O stretching mode at 394 cm<sup>-1</sup>, the breathing mode of the LuO<sub>8</sub> skeleton at the terahertz frequency range. The isotropic scattering profile is given.

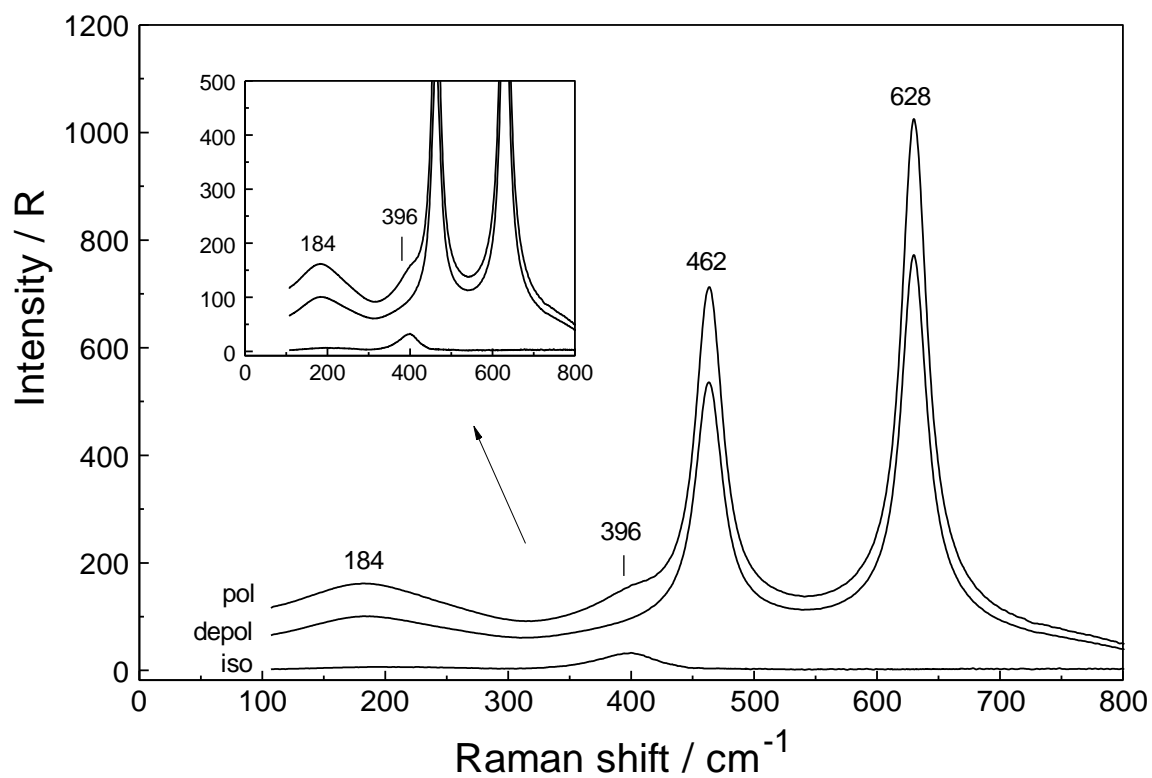

**Figure S2.** Raman scattering profiles in R-format (polarized, depolarized and isotropic scattering profiles) of a  $0.556 \text{ molL}^{-1}$   $\text{Lu}(\text{ClO}_4)_3$  solution ( $R_w = 92.37$ ). The  $\text{ClO}_4^-$ (aq) deformation bands at  $462$  and  $628 \text{ cm}^{-1}$  are depolarized and therefore do not appear in the isotropic scattering. The inset shows symmetric stretching mode,  $\nu_1$  Lu-O, called the breathing mode of the  $\text{LuO}_8$  skeleton at the terahertz frequency range at a larger scale. All scattering profiles are given.

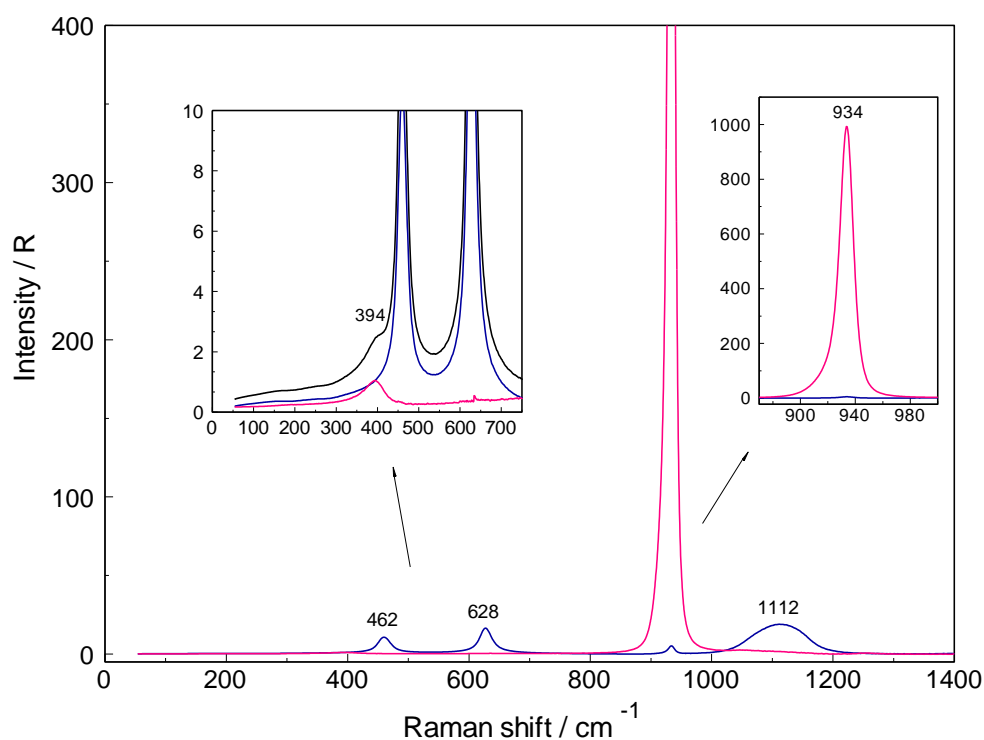

**Figure S3A.** Overview Raman scattering profiles in R-format (from top to bottom: polarized, depolarized and isotropic scattering profiles) of a  $2.233 \text{ molL}^{-1}$   $\text{Lu}(\text{ClO}_4)_3$  solution ( $R_w = 19.01$ ) from  $50 - 1400 \text{ cm}^{-1}$ . The  $\text{ClO}_4^-$ (aq) deformation bands at  $462$  and  $628 \text{ cm}^{-1}$  are depolarized and therefore do not appear in the isotropic scattering. The symmetric stretching mode,  $\nu_1$  of  $\text{ClO}_4^-$  (aq) appears at  $934 \text{ cm}^{-1}$  and the antisymmetric stretching mode  $\nu_3$  of  $\text{ClO}_4^-$ (aq) appears as a depolarized mode at  $1112 \text{ cm}^{-1}$ . The inset at the left side shows  $\nu_1$  Lu-O stretching mode at  $394 \text{ cm}^{-1}$  the breathing mode of the  $\text{LuO}_8$  skeleton at the terahertz frequency range at a larger scale. The inset at the right side shows the  $\nu_1$   $\text{ClO}_4^-$  band at  $934 \text{ cm}^{-1}$  at its full scale.

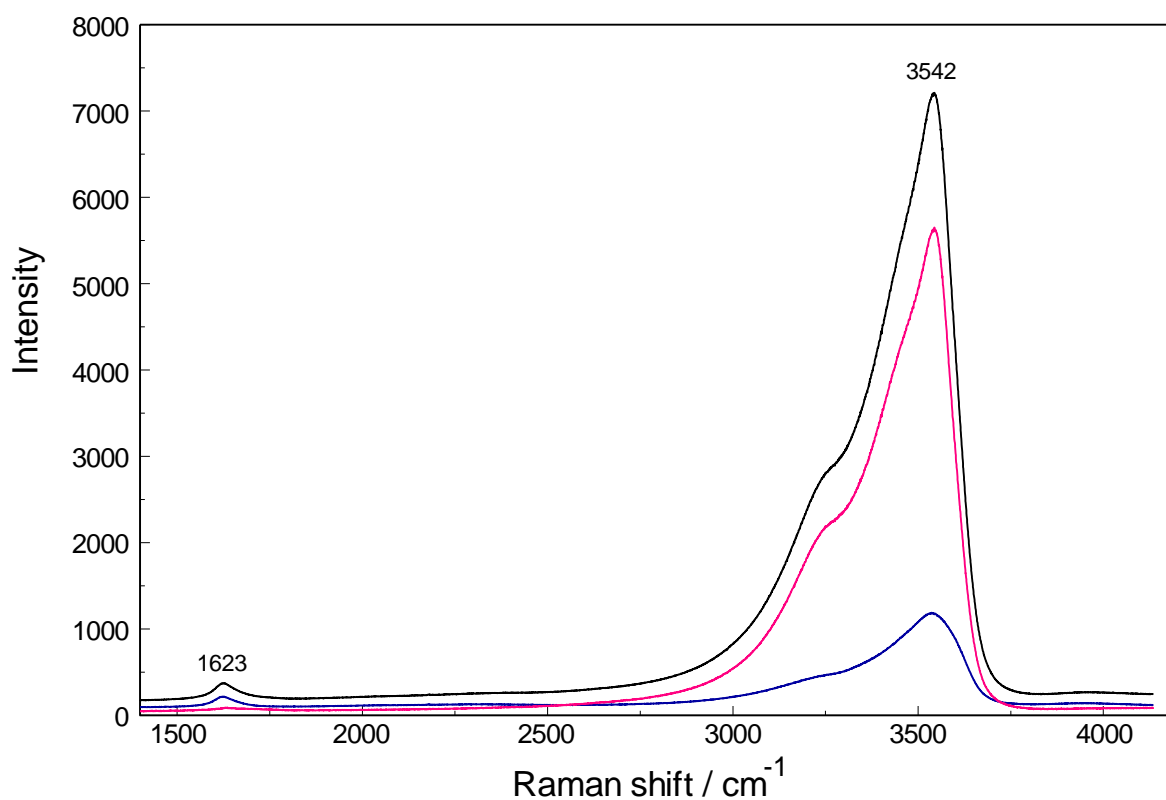

**Figure S3.** Raman profiles of the same 2.233 molL<sup>-1</sup> Lu(ClO<sub>4</sub>)<sub>3</sub> solution in the wavenumber region from 1400 cm<sup>-1</sup> to 4160 cm<sup>-1</sup> (from top to bottom: polarized, depolarized and isotropic scattering profiles). The deformation mode of water appears at 1623 cm<sup>-1</sup> and in the O-H stretching region the water band is modified by the typical ClO<sub>4</sub><sup>-</sup> ··· H<sub>2</sub>O mode of weakly hydrogen bonded O-H oscillators. The strong prominent band at 3542 cm<sup>-1</sup> is due to the weakly bonded O-H...O units of water ··· ClO<sub>4</sub><sup>-</sup>.

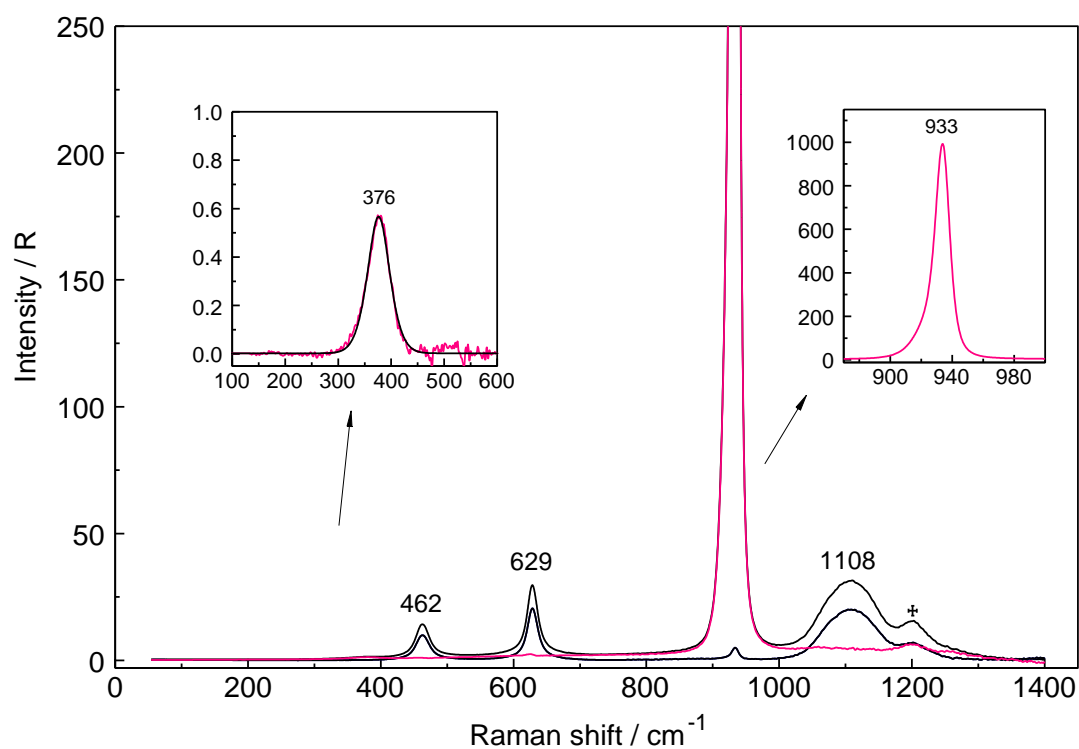

**Figure S4.** Raman spectrum in R-format (from top to bottom: polarized, depolarized and isotropic scattering profiles) of a  $0.439 \text{ molL}^{-1}$   $\text{Lu}(\text{ClO}_4)_3$  solution in  $\text{D}_2\text{O}$ . The  $\text{ClO}_4^- (\text{D}_2\text{O})$  deformation bands at  $462$  and  $629 \text{ cm}^{-1}$  are depolarized and therefore do not appear in the isotropic scattering. The symmetric stretching mode,  $\nu_1\text{ClO}_4^- (\text{D}_2\text{O})$  appears at  $933 \text{ cm}^{-1}$  and the antisymmetric stretching mode,  $\nu_3\text{ClO}_4^- (\text{D}_2\text{O})$  at  $1108 \text{ cm}^{-1}$ . The latter mode is depolarized. The Lu-O breathing mode is shifted to  $376.5 \text{ cm}^{-1}$  compared to the mode in  $\text{Lu}(\text{ClO}_4)_3$  in  $\text{H}_2\text{O}$ , where it appears at  $396 \text{ cm}^{-1}$ . The band marked with the symbol (+) at  $1202 \text{ cm}^{-1}$ , partially polarized, is due to the deformation mode of  $\text{D}_2\text{O}$ .

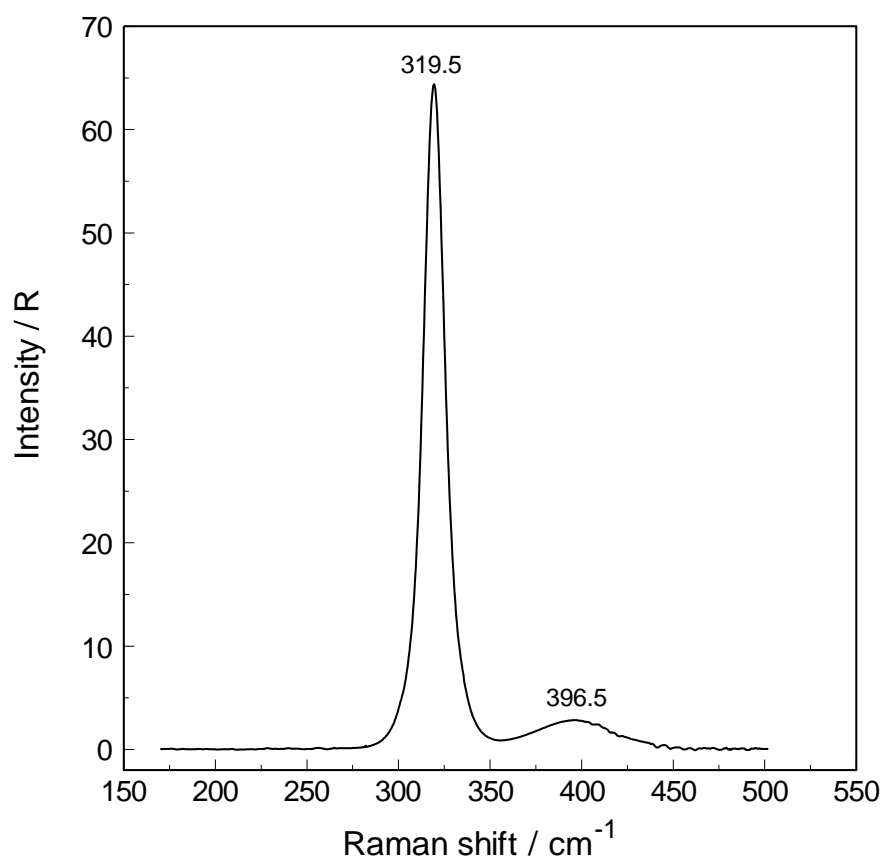

**Figure S5.** Isotropic Raman scattering profile (R-format) of a 1.05 molL<sup>-1</sup> Lu(CF<sub>3</sub>SO<sub>3</sub>)<sub>3</sub> solution. Next to the strong band of triflate at 319.5 cm<sup>-1</sup> appears a small and relatively broad band at 396.5 cm<sup>-1</sup> which is due to the totally symmetric stretching mode of LuO<sub>8</sub>.

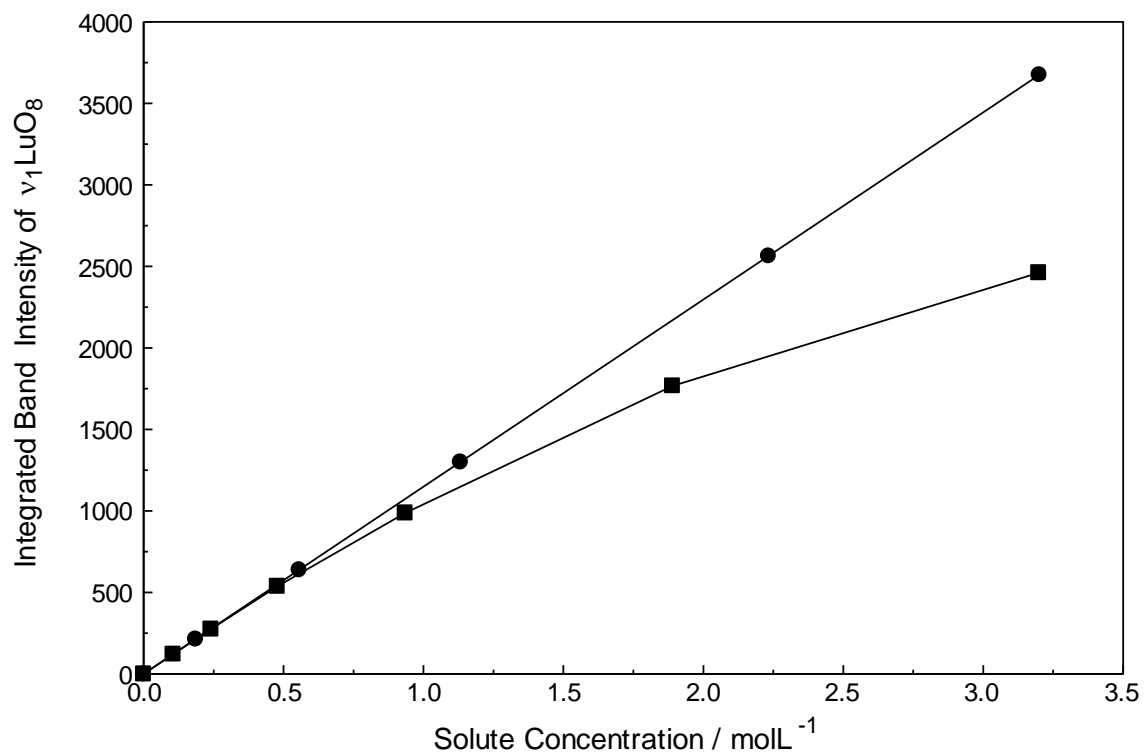

**Figure S6.** Linear regression line of the integrated band intensity  $I_{396}$  as a function of the  $\text{Lu}(\text{ClO}_4)_3$  solution concentration (black circles); upper curve depicts:  $I_{396}=1148.3 \cdot C_T$ , the calibration curve. The lower curve shows the integrated band intensities in  $\text{LuCl}_3$  solutions (black squares).
